1 **TITLE PAGE**

2

3 **Full Title**

4 Systematic interrogation of diverse Omic data reveals interpretable, robust, and generalizable  
5 transcriptomic features of clinically successful therapeutic targets

6 **Short Title**

7 Omic features of successful therapeutic targets

8 **Authors**

9 Andrew D. Rouillard<sup>1</sup>, Mark R. Hurle<sup>1</sup>, Pankaj Agarwal<sup>1\*</sup>

10 **Affiliations**

11 <sup>1</sup>Computational Biology, GSK, King of Prussia, PA, USA

12 **Corresponding Author**

13 \*[pankaj.agarwal@gsk.com](mailto:pankaj.agarwal@gsk.com) (PA)

14

15 **Author Contributions**

16 Andrew D. Rouillard: data curation, formal analysis, methodology, software, visualization,  
17 writing (original draft preparation), writing (review and editing)

18

19 Mark R. Hurle: conceptualization, data curation, methodology, writing (review and editing)

20

21 Pankaj Agarwal: conceptualization, methodology, supervision, writing (review and editing)

22

23 **ABSTRACT**

24

25 Target selection is the first and pivotal step in drug discovery. An incorrect choice may not  
26 manifest itself for many years after hundreds of millions of research dollars have been spent. We  
27 collected a set of 332 targets that succeeded or failed in phase III clinical trials, and explored  
28 whether Omic features describing the target genes could predict clinical success. We obtained  
29 features from the recently published comprehensive resource: Harmonizome. Nineteen features  
30 appeared to be significantly correlated with phase III clinical trial outcomes, but only 4 passed  
31 validation schemes that used bootstrapping or modified permutation tests to assess feature  
32 robustness and generalizability while accounting for target class selection bias. We also used  
33 classifiers to perform multivariate feature selection and found that classifiers with a single  
34 feature performed as well in cross-validation as classifiers with more features (AUROC=0.57  
35 and AUPR=0.81). The two predominantly selected features were mean mRNA expression across  
36 tissues and standard deviation of expression across tissues, where successful targets tended to  
37 have lower mean expression and higher expression variance than failed targets. This finding  
38 supports the conventional wisdom that it is favorable for a target to be present in the tissue(s)  
39 affected by a disease and absent from other tissues. Overall, our results suggest that it is feasible  
40 to construct a model integrating interpretable target features to inform target selection. We  
41 anticipate deeper insights and better models in the future, as researchers can reuse the data we  
42 have provided to improve methods for handling sample biases and learn more informative  
43 features. Code, documentation, and data for this study have been deposited on GitHub at  
44 <https://github.com/arouillard/omic-features-successful-targets>.

45

46 **AUTHOR SUMMARY**

47

48 Drug discovery often begins with a hypothesis that changing the abundance or activity of a  
49 target—a biological molecule, usually a protein—will cure a disease or ameliorate its symptoms.  
50 Whether a target hypothesis translates into a successful therapy depends in part on the  
51 characteristics of the target, but it is not completely understood which target characteristics are  
52 important for success. We sought to answer this question with a supervised machine learning  
53 approach. We obtained outcomes of target hypotheses tested in clinical trials, scoring targets as  
54 successful or failed, and then obtained thousands of features (i.e. properties or characteristics) of  
55 targets from dozens of biological datasets. We statistically tested which features differed  
56 between successful and failed targets, and built a computational model that used these features to  
57 predict success or failure of targets in clinical trials. We found that successful targets tended to  
58 have more variable mRNA abundance from tissue to tissue and lower average abundance across  
59 tissues than failed targets. Thus, it is probably favorable for a target to be present in the tissue(s)  
60 affected by a disease and absent from other tissues. Our work demonstrates the feasibility of  
61 predicting clinical trial outcomes from target features.

62

## 63 INTRODUCTION

64

65 More than half of drug candidates that advance beyond phase I clinical trials fail due to lack of  
66 efficacy (1, 2). One possible explanation for these failures is sub-optimal target selection (3).  
67 Many factors must be considered when selecting a target for drug discovery (4, 5). Intrinsic  
68 factors include the likelihood of the target to be tractable (can the target's activity be altered by a  
69 compound, antibody, or other drug modality?), safe (will altering the target's activity cause  
70 serious adverse events?), and efficacious (will altering the target's activity provide significant  
71 benefit to patients?). Extrinsic factors include the availability of investigational reagents and  
72 disease models for preclinical target validation, whether biomarkers are known for measuring  
73 target engagement or therapeutic effect, the duration and complexity of clinical trials required to  
74 prove safety and efficacy, and the unmet need of patients with diseases that might be treated by  
75 modulating the target.

76

77 Over the past decade, technologies have matured enabling high-throughput genome-,  
78 transcriptome-, and proteome-wide profiling of cells and tissues in normal, disease, and  
79 experimentally perturbed states. In parallel, researchers have made substantial progress curating  
80 or text-mining biomedical literature to extract and organize information about genes and  
81 proteins, such as molecular functions and signaling pathways, into structured datasets. Taken  
82 together, both efforts have given rise to a vast amount of primary, curated, and text-mined data  
83 about genes and proteins, which are stored in online repositories and amenable to computational  
84 analysis (6, 7).

85

86 To improve the success rate of drug discovery projects, researchers have investigated whether  
87 any features of genes or proteins are useful for target selection. These computational studies can  
88 be categorized according to whether the researchers were trying to predict tractability (8, 9),  
89 safety (10-13), efficacy (no publications to our knowledge), or overall success (alternatively  
90 termed “drug target likeness”) (8, 13-26). Closely related efforts include disease gene prediction,  
91 where the goal is to predict genes mechanistically involved in a given disease (27-32), and  
92 disease target prediction, where the goal is to predict genes that would make successful drug  
93 targets for a given disease (33-35).

94  
95 To our knowledge, we report the first screen for features of genes or proteins that distinguish  
96 targets of approved drugs from targets of drug candidates that failed in clinical trials. In contrast,  
97 related prior studies have searched for features that distinguish targets of approved drugs from  
98 the rest of the genome (or a representative subset) (13, 15-25). Using the remainder of the  
99 genome for comparison has been useful for finding features enriched among successful targets,  
100 but it is uncertain whether these features are specific to successful targets or are enriched among  
101 targets of failed drug candidates as well. Our study aims to fill this knowledge gap by directly  
102 testing for features that separate targets by clinical outcome, expanding the scope of prior studies  
103 that have investigated how genetic disease associations (36) and publication trends (37) of  
104 targets correlate with clinical outcome.

105  
106 Our work has five additional innovative characteristics. First, we included only targets of drugs  
107 that are presumed to be selective (no documented polypharmacology) to reduce ambiguity in  
108 assigning clinical trial outcomes to targets. Second, we included only phase III failures to enrich

109 for target efficacy failures, as opposed to safety and target engagement failures, which are more  
110 common in phase I and phase II (2). Third, we excluded targets of assets only indicated for  
111 cancer, as studies have observed that features of successful targets for cancer differ from features  
112 of successful targets for other indications (22, 23), moreover, cancer trials fail more frequently  
113 than trials for other indications (2). Fourth, we interrogated a diverse and comprehensive set of  
114 features, over 150,000 features from 67 datasets covering 16 feature types, whereas prior studies  
115 have examined only features derived from protein sequence (16-18, 24, 25), protein-protein  
116 interactions (13, 15, 18-23), Gene Ontology terms (13, 15, 16), and gene expression profiles (15,  
117 19, 21, 25). Fifth, because targets of drugs and drug candidates do not constitute a random  
118 sample of the genome, we implemented a suite of tests to assess the robustness and  
119 generalizability of features identified as significantly separating successes from failures in the  
120 biased sample.

121  
122 A handful of the initial 150,000+ features passed our tests for robustness and generalizability to  
123 new targets or target classes. Interestingly, these features were predominantly derived from gene  
124 expression datasets. *Notably, two significant features were discovered repeatedly in multiple*  
125 *datasets: successful targets tended to have lower mean mRNA expression across tissues and*  
126 *higher expression variance than failed targets.* We also trained a classifier to predict phase III  
127 success probabilities for untested targets (no phase III clinical trial outcomes reported for drug  
128 candidates that selectively modulate these targets). We identified 943 targets with sufficiently  
129 unfavorable expression characteristics to be predicted twice as likely to fail in phase III clinical  
130 trials as past phase III targets. Furthermore, we identified 2,700,856 target pairs predicted with  
131 99% consistency to have a 2-fold difference in success probability. Such pairwise comparisons

132 may be useful for prioritizing short lists of targets under consideration for a therapeutic program.

133 We conclude this paper with a discussion of the biases and limitations faced when attempting to

134 analyze, model, or interpret data on clinical trial outcomes.

135

136 **RESULTS**

137

138 **Examples of successful and failed targets obtained from phase III clinical trial reports**

139

140 We extracted phase III clinical trial outcomes reported in Pharmaprojects (38) for drug  
141 candidates reported to be selective (single documented target) and tested as treatments for non-  
142 cancer diseases. We grouped the outcomes by target, scored targets with at least one approved  
143 drug as successful ( $N_S=259$ ), and scored targets with no approved drugs and at least one  
144 documented phase III failure as failed ( $N_F=72$ ) (Supplementary Table S1). The target success  
145 rate (77%) appears to be inflated relative to typically reported phase III success rates (58%) (2)  
146 because we scored targets by their best outcome across multiple trials.

147

148 **Comprehensive and diverse collection of target features obtained from the Harmonizome**

149

150 We obtained target features from the Harmonizome (39), a recently published collection of  
151 features of genes and proteins extracted from over 100 Omics datasets. We limited our analysis  
152 to 67 datasets that are in the public domain or GSK had independently licensed (Table 1). Each  
153 dataset in the Harmonizome is organized into a matrix with genes labeling the rows and features  
154 such as diseases, phenotypes, tissues, and pathways labeling the columns. We included the mean  
155 and standard deviation calculated along the rows of each dataset as additional target features.  
156 These summary statistics provide potentially useful and interpretable information about targets,  
157 such as how many pathway associations a target has or how variable a target's expression is  
158 across tissues.



159

160 **Table 1. Datasets tested for features significantly separating successful targets from failed targets.**

| Dataset                                                             | Feature Type                                      | Total Genes | Covered Samples | Total Features | Covered Features | Reduced Features |
|---------------------------------------------------------------------|---------------------------------------------------|-------------|-----------------|----------------|------------------|------------------|
| Roadmap Epigenomics Cell and Tissue DNA Methylation Profiles        | cell or tissue DNA methylation                    | 13835       | 227             | 26             | 26               | 4                |
| Allen Brain Atlas Adult Human Brain Tissue Gene Expression Profiles | cell or tissue expression                         | 17979       | 287             | 416            | 416              | 2                |
| Allen Brain Atlas Adult Mouse Brain Tissue Gene Expression Profiles | cell or tissue expression                         | 14248       | 287             | 2234           | 2234             | 2                |
| BioGPS Human Cell Type and Tissue Gene Expression Profiles          | cell or tissue expression                         | 16383       | 320             | 86             | 86               | 2                |
| BioGPS Mouse Cell Type and Tissue Gene Expression Profiles          | cell or tissue expression                         | 15443       | 313             | 76             | 76               | 2                |
| GTEx Tissue Gene Expression Profiles                                | cell or tissue expression                         | 26005       | 328             | 31             | 31               | 2                |
| GTEx Tissue Sample Gene Expression Profiles                         | cell or tissue expression                         | 19250       | 301             | 2920           | 2920             | 2                |
| HPA Cell Line Gene Expression Profiles                              | cell or tissue expression                         | 15868       | 259             | 45             | 45               | 1                |
| HPA Tissue Gene Expression Profiles                                 | cell or tissue expression                         | 17496       | 314             | 33             | 33               | 2                |
| HPA Tissue Protein Expression Profiles                              | cell or tissue expression                         | 15788       | 266             | 46             | 46               | 11               |
| HPA Tissue Sample Gene Expression Profiles                          | cell or tissue expression                         | 16742       | 300             | 123            | 123              | 2                |
| HPM Cell Type and Tissue Protein Expression Profiles                | cell or tissue expression                         | 7274        | 94              | 6              | 6                | 2                |
| ProteomicsDB Cell Type and Tissue Protein Expression Profiles       | cell or tissue expression                         | 2776        | 28              | 55             | 55               | 5                |
| Roadmap Epigenomics Cell and Tissue Gene Expression Profiles        | cell or tissue expression                         | 12824       | 164             | 59             | 59               | 6                |
| TISSUES Curated Tissue Protein Expression Evidence Scores           | cell or tissue expression                         | 16216       | 317             | 645            | 245              | 106              |
| TISSUES Experimental Tissue Protein Expression Evidence Scores      | cell or tissue expression                         | 17922       | 316             | 245            | 244              | 44               |
| TISSUES Text-mining Tissue Protein Expression Evidence Scores       | cell or tissue expression                         | 16184       | 330             | 4189           | 2974             | 2118             |
| ENCODE Histone Modification Site Profiles                           | cell or tissue histone modification sites         | 22382       | 330             | 437            | 432              | 91               |
| Roadmap Epigenomics Histone Modification Site Profiles              | cell or tissue histone modification sites         | 21032       | 313             | 385            | 295              | 282              |
| ENCODE Transcription Factor Binding Site Profiles                   | cell or tissue transcription factor binding sites | 22845       | 330             | 1681           | 1591             | 723              |
| JASPAR Predicted Transcription Factor Targets                       | cell or tissue transcription factor binding sites | 21547       | 330             | 113            | 80               | 77               |
| COMPARTMENTS Curated Protein Localization Evidence Scores           | cellular compartment associations                 | 16738       | 330             | 1465           | 228              | 105              |
| COMPARTMENTS Experimental Protein Localization Evidence Scores      | cellular compartment associations                 | 6495        | 73              | 61             | 37               | 10               |
| COMPARTMENTS Text-mining Protein Localization Evidence Scores       | cellular compartment associations                 | 14375       | 330             | 2083           | 877              | 545              |
| GO Cellular Component Annotations                                   | cellular compartment associations                 | 16757       | 328             | 1549           | 208              | 124              |
| LOCATE Curated Protein Localization Annotations                     | cellular compartment associations                 | 9639        | 269             | 80             | 50               | 20               |
| LOCATE Predicted Protein Localization Annotations                   | cellular compartment associations                 | 19747       | 325             | 26             | 23               | 10               |
| CTD Gene-Chemical Interactions                                      | chemical interactions                             | 11125       | 321             | 9518           | 2222             | 2042             |
| Guide to Pharmacology Chemical Ligands of Receptors                 | chemical interactions                             | 899         | 209             | 4896           | 189              | 52               |
| Kinativ Kinase Inhibitor Bioactivity Profiles                       | chemical interactions                             | 232         | 9               | 28             | 28               | 25               |
| KinomeScan Kinase Inhibitor Targets                                 | chemical interactions                             | 287         | 10              | 75             | 75               | 72               |

|                                                                       |                                                      |       |     |       |      |      |
|-----------------------------------------------------------------------|------------------------------------------------------|-------|-----|-------|------|------|
| CMAP Signatures of Differentially Expressed Genes for Small Molecules | chemical perturbation differentially expressed genes | 12148 | 300 | 6102  | 5066 | 5065 |
| ClinVar SNP-Phenotype Associations                                    | disease or phenotype associations                    | 2458  | 143 | 3293  | 3    | 2    |
| CTD Gene-Disease Associations                                         | disease or phenotype associations                    | 21582 | 331 | 6327  | 2926 | 2116 |
| dbGAP Gene-Trait Associations                                         | disease or phenotype associations                    | 5668  | 147 | 512   | 51   | 49   |
| DISEASES Curated Gene-Disease Association Evidence Scores             | disease or phenotype associations                    | 2252  | 115 | 772   | 94   | 49   |
| DISEASES Experimental Gene-Disease Association Evidence Scores        | disease or phenotype associations                    | 4055  | 131 | 352   | 106  | 43   |
| DISEASES Text-mining Gene-Disease Association Evidence Scores         | disease or phenotype associations                    | 15309 | 330 | 4630  | 2559 | 1850 |
| GAD Gene-Disease Associations                                         | disease or phenotype associations                    | 10705 | 318 | 12780 | 1189 | 980  |
| GAD High Level Gene-Disease Associations                              | disease or phenotype associations                    | 8016  | 314 | 20    | 19   | 16   |
| GWAS Catalog Gene-Disease Associations                                | disease or phenotype associations                    | 4356  | 127 | 1009  | 30   | 28   |
| GWASdb SNP-Disease Associations                                       | disease or phenotype associations                    | 11805 | 253 | 587   | 252  | 126  |
| GWASdb SNP-Phenotype Associations                                     | disease or phenotype associations                    | 12488 | 261 | 824   | 397  | 150  |
| HPO Gene-Disease Associations                                         | disease or phenotype associations                    | 3158  | 171 | 6844  | 1187 | 667  |
| HuGE Navigator Gene-Phenotype Associations                            | disease or phenotype associations                    | 12055 | 322 | 2755  | 1241 | 1153 |
| MPO Gene-Phenotype Associations                                       | disease or phenotype associations                    | 7798  | 299 | 8581  | 2434 | 1444 |
| OMIM Gene-Disease Associations                                        | disease or phenotype associations                    | 4553  | 209 | 6177  | 5    | 4    |
| GeneSigDB Published Gene Signatures                                   | gene signatures or modules                           | 19723 | 331 | 3517  | 1363 | 1313 |
| MSigDB Cancer Gene Co-expression Modules                              | gene signatures or modules                           | 4869  | 135 | 358   | 135  | 95   |
| MiRTarBase microRNA Targets                                           | microRNA targets                                     | 12086 | 218 | 598   | 93   | 91   |
| TargetScan Predicted Conserved microRNA Targets                       | microRNA targets                                     | 14923 | 283 | 1539  | 1020 | 791  |
| TargetScan Predicted Nonconserved microRNA Targets                    | microRNA targets                                     | 18210 | 324 | 1541  | 1534 | 1236 |
| GO Biological Process Annotations                                     | pathway, function, or process associations           | 15717 | 328 | 13214 | 2436 | 1215 |
| GO Molecular Function Annotations                                     | pathway, function, or process associations           | 15777 | 327 | 4164  | 367  | 204  |
| HumanCyc Pathways                                                     | pathway, function, or process associations           | 932   | 41  | 288   | 11   | 8    |
| KEGG Pathways                                                         | pathway, function, or process associations           | 7016  | 298 | 303   | 185  | 179  |
| PANTHER Pathways                                                      | pathway, function, or process associations           | 1962  | 138 | 147   | 40   | 39   |
| Reactome Pathways                                                     | pathway, function, or process associations           | 9005  | 309 | 1814  | 289  | 159  |
| Wikipathways Pathways                                                 | pathway, function, or process associations           | 4958  | 263 | 301   | 140  | 137  |
| DEPOD Substrates of Phosphatases                                      | phosphatase interactions                             | 293   | 19  | 114   | 13   | 9    |
| NURSA Protein Complexes                                               | protein complex associations                         | 9785  | 141 | 1798  | 1182 | 1181 |
| InterPro Predicted Protein Domain Annotations                         | protein domain associations                          | 18002 | 329 | 11017 | 119  | 63   |
| BioGRID Protein-Protein Interactions                                  | protein interactions                                 | 15270 | 306 | 15272 | 1191 | 1163 |
| DIP Protein-Protein Interactions                                      | protein interactions                                 | 2709  | 140 | 2711  | 32   | 24   |
| Guide to Pharmacology Protein Ligands of Receptors                    | protein interactions                                 | 187   | 46  | 213   | 5    | 4    |

|                                  |                      |       |     |        |       |       |
|----------------------------------|----------------------|-------|-----|--------|-------|-------|
| IntAct Biomolecular Interactions | protein interactions | 12303 | 269 | 12305  | 422   | 417   |
| GTEx eQTL                        | SNP eQTL targets     | 7898  | 107 | 7817   | 2     | 1     |
| TOTALS                           | NA                   | NA    | NA  | 174228 | 44092 | 28562 |

161  
162 The datasets contained a total of 174,228 features covering 16 feature types (Table 1). We  
163 restricted our analysis to 44,092 features that had at least three non-zero values for targets  
164 assigned a phase III outcome. Many datasets had strong correlations among their features. To  
165 reduce feature redundancy and avoid excessive multiple hypothesis testing while maintaining  
166 interpretability of features, we replaced each group of highly correlated features with the group  
167 mean feature and assigned it a representative label (Fig 1, Supplementary Table S2). The number  
168 of features shrunk to 28,562 after reducing redundancy.

169  
170 **Fig 1. Feature Selection Pipeline.** Each dataset took the form of a matrix with genes labeling the rows and features  
171 labeling the columns. We appended the mean and standard deviation computed across all features as two additional  
172 features. **Step 1:** We filtered the columns to eliminate redundant features, replacing each group of correlated  
173 features with the group average feature, where a group was defined as features with squared pair-wise correlation  
174 coefficient  $r^2 \geq 0.5$ . If the dataset mean feature was included in a group of correlated features, we replaced the group  
175 with the dataset mean. **Step 2:** We filtered the rows for targets with clinical trial outcomes of interest: targets of  
176 selective drugs approved for non-cancer indications (successes) and targets of selective drug candidates that failed in  
177 phase III clinical trials for non-cancer indications (failures). **Step 3:** We tested the significance of each feature as an  
178 indicator of success or failure using permutation tests to quantify the significance of the difference between the  
179 means of the successful and failed targets. We corrected for multiple hypothesis testing using the Benjamini-  
180 Yekutieli method to control the false discovery rate at 0.05 within each dataset. **Step 4:** We “stressed” the  
181 significant features with additional tests to assess their robustness and generalizability. For example, we used  
182 bootstrapping to estimate probabilities that the significance findings will replicate on similar sets of targets.

183  
184 **Target features tested for correlation with phase III outcome**

185  
 186 We performed permutation tests (40, 41) on the remaining 28,562 target features to find features  
 187 with a significant difference between the successful and failed targets, and we corrected p-values  
 188 for multiple hypothesis testing using the Benjamini-Yekutieli method (42) (Fig 1, Supplementary  
 189 Table S2). We used permutation testing to apply the same significance testing method to all  
 190 features, since they had heterogeneous data distributions. We detected 19 features correlated with  
 191 clinical outcome at a within-dataset false discovery rate of 0.05 (Table 2). The significant  
 192 features were derived from 7 datasets, of which 6 datasets were gene expression atlases: Allen  
 193 Brain Atlas adult human brain tissues (43, 44), Allen Brain Atlas adult mouse brain tissues (43,  
 194 45), BioGPS human cell types and tissues (46-48), BioGPS mouse cell types and tissues (46-48),  
 195 Genotype-Tissue Expression Project (GTEx) human tissues (49, 50), and Human Protein Atlas  
 196 (HPA) human tissues (51). The remaining dataset, TISSUES (52), was an integration of  
 197 experimental gene and protein tissue expression evidence from multiple sources. Two  
 198 correlations were significant in multiple datasets: successful targets tended to have lower mean  
 199 expression across tissues and higher expression variance than failed targets.

200

201 **Table 2. Features significantly correlated with phase III outcome.**

| Dataset                                                             | Feature       | Corr Pval | Correlation Sign | Correlated Target Classes (and sign) | Repl Prob (Bootstrap) | Repl Prob (Class Holdout Bootstrap) | Repl Prob (Within Class Permutation Bootstrap) |
|---------------------------------------------------------------------|---------------|-----------|------------------|--------------------------------------|-----------------------|-------------------------------------|------------------------------------------------|
| BioGPS Human Cell Type and Tissue Gene Expression Profiles          | [mean]        | 0.001     | -1               | GPCRs (-1)                           | 0.89                  | 0.98                                | 0.83                                           |
| BioGPS Human Cell Type and Tissue Gene Expression Profiles          | stdv          | 0.010     | -1               | GPCRs (-1), Integrins (+1)           | <del>0.69</del>       | <del>0.56</del>                     | <del>0.32</del>                                |
| BioGPS Mouse Cell Type and Tissue Gene Expression Profiles          | [mean]        | 0.042     | -1               | GPCRs (-1)                           | <del>0.55</del>       | <del>0.71</del>                     | <del>0.56</del>                                |
| Allen Brain Atlas Adult Human Brain Tissue Gene Expression Profiles | [mean]        | 0.006     | -1               | GPCRs (-1)                           | <del>0.78</del>       | 0.80                                | <del>0.78</del>                                |
| Allen Brain Atlas Adult Mouse Brain Tissue Gene Expression Profiles | r3 roof plate | 0.002     | -1               | None                                 | 0.88                  | 1.00                                | 0.89                                           |
| Allen Brain Atlas Adult Mouse Brain Tissue Gene Expression Profiles | [mean]        | 0.007     | -1               | None                                 | <del>0.76</del>       | 1.00                                | <del>0.79</del>                                |
| GTEx Tissue Gene Expression Profiles                                | [mean]        | 0.014     | -1               | GPCRs (-1)                           | <del>0.65</del>       | <del>0.60</del>                     | <del>0.76</del>                                |
| GTEx Tissue Gene Expression Profiles                                | stdv          | 0.014     | +1               | GPCRs (+1)                           | <del>0.69</del>       | 0.94                                | <del>0.76</del>                                |

|                                                                                                                                                                     |                                |       |    |                            |                 |                 |                 |
|---------------------------------------------------------------------------------------------------------------------------------------------------------------------|--------------------------------|-------|----|----------------------------|-----------------|-----------------|-----------------|
| HPA Tissue Gene Expression Profiles                                                                                                                                 | [mean]                         | 0.004 | -1 | GPCRs (-1)                 | 0.80            | 0.90            | 0.85            |
| HPA Tissue Gene Expression Profiles                                                                                                                                 | stdv                           | 0.004 | +1 | None                       | 0.81            | 1.00            | 0.81            |
| TISSUES Experimental Tissue Protein Expression Evidence Scores                                                                                                      | bone marrow                    | 0.001 | -1 | GPCRs (-1)                 | 0.92            | 0.96            | <del>0.66</del> |
| TISSUES Experimental Tissue Protein Expression Evidence Scores                                                                                                      | [hematopoietic cells]          | 0.001 | -1 | GPCRs (-1), Integrins (+1) | 0.93            | 1.00            | <del>0.72</del> |
| TISSUES Experimental Tissue Protein Expression Evidence Scores                                                                                                      | [mean]                         | 0.001 | -1 | GPCRs (-1)                 | 0.85            | 0.99            | <del>0.76</del> |
| TISSUES Experimental Tissue Protein Expression Evidence Scores                                                                                                      | [epithalamus and pineal gland] | 0.012 | -1 | None                       | <del>0.73</del> | 0.97            | <del>0.49</del> |
| TISSUES Experimental Tissue Protein Expression Evidence Scores                                                                                                      | erythroid cell                 | 0.015 | -1 | None                       | <del>0.68</del> | 0.94            | <del>0.45</del> |
| TISSUES Experimental Tissue Protein Expression Evidence Scores                                                                                                      | [t-lymphocyte]                 | 0.017 | -1 | None                       | <del>0.65</del> | 0.95            | <del>0.65</del> |
| TISSUES Experimental Tissue Protein Expression Evidence Scores                                                                                                      | [miscellaneous tissues]        | 0.017 | -1 | GPCRs (-1)                 | <del>0.64</del> | <del>0.64</del> | <del>0.63</del> |
| TISSUES Experimental Tissue Protein Expression Evidence Scores                                                                                                      | [thymus and thorax]            | 0.017 | -1 | Integrins (+1)             | <del>0.60</del> | <del>0.37</del> | <del>0.44</del> |
| TISSUES Experimental Tissue Protein Expression Evidence Scores                                                                                                      | adrenal cortex                 | 0.043 | -1 | None                       | <del>0.44</del> | <del>0.62</del> | <del>0.45</del> |
| Footnotes                                                                                                                                                           |                                |       |    |                            |                 |                 |                 |
| Abbreviations: Corr Pval = p-value corrected for multiple hypothesis testing, Repl Prob = replication probability.                                                  |                                |       |    |                            |                 |                 |                 |
| [Square brackets] denote groups of features.                                                                                                                        |                                |       |    |                            |                 |                 |                 |
| [miscellaneous tissues] is a heterogeneous group of digestive, respiratory, urogenital, reproductive, nervous, cardiovascular, and hematopoietic system tissues.    |                                |       |    |                            |                 |                 |                 |
| White background indicates features that passed all tests for robustness and generalizability.                                                                      |                                |       |    |                            |                 |                 |                 |
| Gray background indicates features that failed at least one test for robustness or generalizability. <del>Strikethrough italics</del> indicates the failed test(s). |                                |       |    |                            |                 |                 |                 |

202

203 **Significant features tested for robustness to sample variation and generalization across**  
 204 **target classes**

205

206 Because targets of drugs and drug candidates do not constitute a random sample of the genome,  
 207 features that separate successful targets from failed targets in our sample may perform poorly as  
 208 genome-wide predictors of success versus failure. We performed three analyses to address this  
 209 issue (Fig 1).

210

211 *Robustness to sample variation*

212

213 We used bootstrapping (53, 54) (sampling with replacement from the original set of examples to  
214 construct sets of examples equal in size to the original set) to investigate how robust our  
215 significance findings were to variation in the success and failure examples. For each dataset that  
216 yielded significant features in our primary analysis, we repeated the analysis on 1000 bootstrap  
217 samples and quantified the replication probability (55) of each feature as the fraction of  
218 bootstraps yielding a significant correlation with phase III outcome at a within-dataset false  
219 discovery rate of 0.05. Twelve features had less than 80% probability (considered a strong  
220 replication probability in (55)) that their correlation with clinical outcome will generalize to new  
221 examples (Table 2).

222

### 223 *Robustness to target class variation*

224

225 We tested if any of the significance findings depended upon the presence of targets from a single  
226 target class in our sample. We obtained target class labels (i.e. gene family labels) from the  
227 HUGO Gene Nomenclature Committee (56), tested if any target classes were significantly  
228 correlated with phase III outcome, and then tested if these classes were correlated with any  
229 features. The GPCR and integrin classes were correlated with phase III outcome as well as  
230 several features (Table 2). This raised the possibility that instead of these features being genome-  
231 wide indicators of clinical outcome, they were simply reflecting the fact that many GPCRs have  
232 succeeded (62/70,  $p < 0.05$ ) or that integrins have failed (3/3,  $p < 0.01$ ). To test this possibility, we  
233 repeated the bootstrapping procedure described above to obtain replication probabilities, except  
234 excluded GPCRs and integrins from being drawn in the bootstrap samples. Six features had less

235 than 80% probability that their correlation with clinical outcome will generalize to new target  
236 classes (Table 2).

237

### 238 *Generalization across target classes*

239

240 In the preceding analysis, we checked one target class at a time for its impact on our significance  
241 findings. To broadly test whether features generalize across target classes, we repeated the  
242 permutation testing described in our initial analysis, but only shuffled the success/failure labels  
243 within target classes, inspired by the work of Epstein et al. (57) on correcting for confounders in  
244 permutation testing. By generating a null distribution with preserved ratio of successes to failures  
245 within each target class, features must correlate with clinical outcome within multiple classes to  
246 be significant, while features that discriminate between classes will not be significant. We  
247 repeated the modified permutation tests on 1000 bootstrap samples to obtain replication  
248 probabilities. We rejected fifteen features that had less than 80% probability that their correlation  
249 with clinical outcome generalizes across target classes (Table 2). This set of fifteen features  
250 included all features with less than 80% replication probability in either of the previous two tests.  
251 The remaining robust and generalizable features were: 1) mean mRNA expression across tissues  
252 (HPA and BioGPS human tissue expression datasets), 2) standard deviation of expression across  
253 tissues (HPA human tissue expression dataset), and 3) expression in r3 roof plate (Allen Brain  
254 Atlas adult mouse brain tissue expression dataset). The r3 roof plate expression profile was  
255 correlated with mean expression across tissues in the Allen Brain Atlas dataset ( $r^2=0.47$ ), falling  
256 just below the  $r^2=0.5$  cut-off that would have grouped r3 roof plate with the mean expression  
257 profile during dimensionality reduction.

258

## 259 **Classifier-based assessment of feature usefulness and interpretability**

260

261 Statistical significance did not guarantee the remaining features would be useful in practice for  
262 discriminating between successes and failures. To test their utility, we trained a classifier to  
263 predict target success or failure, using cross-validation to select a model type (Random Forest or  
264 logistic regression) and a subset of features useful for prediction. Because we used all targets  
265 with phase III outcomes for the feature selection procedure described above, simply using the  
266 final set of features to train a classifier on the same data would yield overly optimistic  
267 performance, even with cross-validation. Therefore, we implemented a nested cross-validation  
268 routine to perform both feature selection and model selection (58).

269

### 270 *Cross-validation routine*

271

272 The outer loop of the cross-validation routine had five steps (Fig 2): 1) separation of targets with  
273 phase III outcomes into training and testing sets, 2) univariate feature selection using the training  
274 set, 3) aggregation of features from different datasets into a single feature matrix, 4) classifier-  
275 based feature selection and model selection using the training set, and 5) evaluation of the  
276 classifier on the test set. Step 4 used an inner loop with 5-fold cross-validation repeated 20 times  
277 to estimate the performance of different classifier types (Random Forest or logistic regression)  
278 and feature subsets (created by incremental feature elimination). The simplest classifier (least  
279 number of features, with logistic regression considered simpler than Random Forest) with cross-  
280 validation values for area under the receiver operating characteristic curve (AUROC) and area



281 under the precision-recall curve (AUPR) within 95% of maximum was selected. The outer loop  
282 used 5-fold cross-validation repeated 200 times, which provided 1000 train-test cycles for  
283 estimating the generalization performance of the classifier and characterizing the consistency of  
284 the selected features and model type.

285  
286 **Fig 2. Modeling Pipeline.** We trained a classifier to predict phase III clinical trial outcomes, using 5-fold cross-  
287 validation repeated 200 times to assess the stability of the classifier and estimate its generalization performance. For  
288 each fold of cross-validation, modeling began with the non-redundant features for each dataset. **Step 1:** We split the  
289 targets with phase III outcomes into training and testing sets. **Step 2:** We performed univariate feature selection  
290 using permutation tests to quantify the significance of the difference between the means of the successful and failed  
291 targets in the training examples. We controlled for target class as a confounding factor by only shuffling outcomes  
292 within target classes. We accepted features with adjusted p-values less than 0.05 after correcting for multiple  
293 hypothesis testing using the Benjamini-Yekutieli method. **Step 3:** We aggregated significant features from all  
294 datasets into a single feature matrix. **Step 4:** We performed incremental feature elimination with an inner 5-fold  
295 cross-validation loop repeated 20 times to select the type of classifier (Random Forest or logistic regression) and  
296 smallest subset of features that had cross-validation area under the receiver operating characteristic curve (AUROC)  
297 and area under the precision-recall curve (AUPR) values within 95% of maximum. **Step 5:** We refit the selected  
298 model using all the training examples and evaluated its performance on the test examples.

299  
300 *Classifier consistency*

301  
302 Simple models were consistently selected for the classifier (Table 3, Supplementary Table S3).  
303 In 1000 train-test cycles, a logistic regression model with one feature was selected most the time  
304 (66%), followed in frequency by a logistic regression model with two features (8%), a Random  
305 Forest model with two features (8%), and a logistic regression model with three features (6%).  
306 Other combinations of model type (logistic regression or Random Forest) and number of features

307 (ranging from 1 to 8) appeared 11% of the time (each 4% or less). For one of the train-test cycles  
308 (0.1%), no significant features were found in the univariate feature selection step, resulting in a  
309 null model. Note that the logistic regression models were selected primarily because we imposed  
310 a preference for simple and interpretable models, not because they performed better than  
311 Random Forest models. The Random Forest model tended to perform as well as the logistic  
312 regression model on the inner cross-validation loop, with AUROC =  $0.62 \pm 0.06$  for Random  
313 Forest and  $0.63 \pm 0.05$  for logistic regression (Supplementary Table S4).

314

315 **Table 3. Distribution of train-test cycles by classifier type and number of selected features.**

|                                                                   |   | Selected Model Type |               |       |
|-------------------------------------------------------------------|---|---------------------|---------------|-------|
|                                                                   |   | Logistic Regression | Random Forest | Total |
| Selected Features                                                 | 1 | 662                 | 5             | 667   |
|                                                                   | 2 | 82                  | 84            | 166   |
|                                                                   | 3 | 57                  | 41            | 98    |
|                                                                   | 4 | 22                  | 2             | 24    |
|                                                                   | 5 | 24                  | 1             | 25    |
|                                                                   | 6 | 11                  | 0             | 11    |
|                                                                   | 7 | 6                   | 0             | 6     |
|                                                                   | 8 | 2                   | 0             | 2     |
| Total                                                             |   | 866                 | 133           | 999*  |
| Footnotes                                                         |   |                     |               |       |
| * 1 train-test cycle yielded no significant features for modeling |   |                     |               |       |

316

317 Gene expression features were consistently selected for the classifier (Table 4, Supplementary  
318 Table S3). Mean mRNA expression across tissues and standard deviation of expression across  
319 tissues had frequencies of 69% and 59%, respectively. More precisely, 36% of the models used  
320 mean mRNA expression across tissues as the only feature, 31% used standard deviation of  
321 expression as the only feature, and 12% used mean and standard deviation as the only two  
322 features. Other expression features appeared in 21% of the models. These expression features

323 tended to be correlated with mean expression across tissues (median  $r^2=0.49$ ). Disease  
324 association features appeared in 0.4% of the models.

325

326 **Table 4. Number of train-test cycles in which feature was selected for the classifier.**

| Feature Type                               | Feature                           | Count |
|--------------------------------------------|-----------------------------------|-------|
| cell or tissue expression                  | mean across tissues               | 685   |
| cell or tissue expression                  | standard deviation across tissues | 585   |
| cell or tissue expression                  | other                             | 214   |
| disease or phenotype associations          | mean across diseases              | 2     |
| disease or phenotype associations          | other                             | 2     |
| pathway, function, or process associations | any                               | 1     |

327

### 328 *Classifier performance*

329

330 The classifier consistently had better than random performance in cross-validation (Fig 3, Table  
331 5, Supplementary Table S5). The 2.5<sup>th</sup>, 50<sup>th</sup>, and 97.5<sup>th</sup> percentiles for AUROC were 0.51, 0.57,  
332 and 0.61. For comparison, a random ordering of targets would yield an AUROC of 0.50. The  
333 receiver operating characteristic curve showed that there was no single cut-off that would  
334 provide satisfactory discrimination between successes and failures (Fig 3A). For an alternative  
335 view, we used kernel density estimation (59) to fit distributions of the probability of success  
336 predicted by the classifier for the successful, failed, and unlabeled targets (Fig 3B,  
337 Supplementary Table S1). The distributions for successes and failures largely overlapped, except  
338 in the tails.

339

340 **Fig 3. Classifier Performance.** (A) Receiver operating characteristic (ROC) curve. The solid black line indicates  
341 the median performance across 200 repetitions of 5-fold cross-validation and the gray area indicates the range of the  
342 2.5 and 97.5 percentiles. The dotted black line indicates the performance of random rankings. (B) Distributions of  
343 the probability of success predicted by the classifier for the successful, failed, and unlabeled targets. (C) Precision-

344 recall curve for success predictions. **(D)** Precision-recall curve for failure predictions. **(E)** Pairwise target  
 345 comparisons. For each pair of targets, we computed the fraction of repetitions of cross-validation in which Target B  
 346 had a higher predicted probability of success greater than Target A. The heatmap illustrates this fraction, thresholded  
 347 at 0.95 or 0.99, plotted as a function of the median predicted probabilities of success of two targets. The upper left  
 348 region is where the classifier is 95% (above solid black line) or 99% (above dotted blue line) consistent in predicting  
 349 greater probability of success of Target B than Target A. **(F)** Relationship between features and phase III outcomes.  
 350 Heat map showing the projection of the predicted success probabilities onto the two dominant features selected for  
 351 the classifier: mean expression across tissues and standard deviation of expression across tissues. Red, white, and  
 352 blue background colors correspond to 1, 0.5, and 0 success probabilities. Red plusses and blue crosses mark the  
 353 locations of the success and failure examples. It appears the model has learned that failures tend to have high mean  
 354 expression and low standard deviation of expression across tissues, while successes tend to have low mean  
 355 expression and high standard deviation of expression. The success and failure examples are not well separated,  
 356 indicating that we did not discover enough features to fully explain why targets succeed or fail in phase III clinical  
 357 trials.

358

359 **Table 5. Classifier performance statistics.**

| Statistic                                                  | 2.5 Percentile | Median | 97.5 Percentile |
|------------------------------------------------------------|----------------|--------|-----------------|
| True Positives (TP)                                        | 91             | 220    | 243             |
| False Positives (FP)                                       | 16             | 52     | 65              |
| True Negatives (TN)                                        | 5              | 16     | 52              |
| False Negatives (FN)                                       | 1              | 24     | 154             |
| True Positive Rate (TPR)                                   | 0.370          | 0.903  | 0.995           |
| False Positive Rate (FPR)                                  | 0.232          | 0.762  | 0.928           |
| False Negative Rate (FNR)                                  | 0.005          | 0.096  | 0.630           |
| True Negative Rate (TNR)                                   | 0.072          | 0.237  | 0.768           |
| Misclassification Rate (MCR)                               | 0.206          | 0.241  | 0.542           |
| Accuracy (ACC)                                             | 0.458          | 0.759  | 0.794           |
| False Discovery Rate (FDR)                                 | 0.149          | 0.194  | 0.213           |
| Positive Predictive Value (PPV)                            | 0.787          | 0.806  | 0.851           |
| False Omission Rate (FOMR)                                 | 0.233          | 0.583  | 0.741           |
| Negative Predictive Value (NPV)                            | 0.259          | 0.417  | 0.767           |
| Area Under Receiver Operating Characteristic Curve (AUROC) | 0.512          | 0.574  | 0.615           |
| Area Under Precision-Recall Curve (AUPR)                   | 0.777          | 0.811  | 0.836           |

|                                        |       |       |        |
|----------------------------------------|-------|-------|--------|
| Positive Likelihood Ratio (PLR)        | 1.058 | 1.184 | 1.619  |
| Negative Likelihood Ratio (NLR)        | 0.086 | 0.402 | 0.819  |
| Diagnostic Odds Ratio (DOR)            | 1.748 | 3.066 | 13.344 |
| Risk Ratio (RR)                        | 1.143 | 1.387 | 3.447  |
| Matthews Correlation Coefficient (MCC) | 0.100 | 0.178 | 0.251  |

360

361 We attempted to identify subsets of targets with high positive predictive value (PPV) or high  
362 negative predictive value (NPV). The median PPV rose as high as 0.99, but uncertainty in the  
363 PPV was so large that we could not be confident in identifying any subset of targets with a  
364 predicted success rate better than the historical 0.77 (Fig 3C). The median NPV rose to 0.40,  
365 roughly twice the historical failure rate of 0.23. Furthermore, at 0.40 median NPV, 99% of the  
366 cross-validation repetitions had an NPV greater than the historical failure rate (Fig 3D). Using  
367 this cut-off, we identified 943 unlabeled targets expected to be twice as likely to fail in phase III  
368 clinical trials as past phase III targets.

369

370 We reasoned that a more practical use of the classifier would be to make pair-wise comparisons  
371 among a short list of targets already under consideration for a therapeutic program. To assess the  
372 utility of the classifier for this purpose, for every pair of targets  $T_A$  and  $T_B$ , we computed the  
373 fraction of cross-validation runs in which the classifier predicted greater probability of success  
374 for  $T_B$  than  $T_A$ . We identified 67,270,678 target pairs (39%) with at least a 0.1 difference in  
375 median success probability where the classifier was 95% consistent in predicting greater  
376 probability of success for  $T_B$  than  $T_A$ . The classifier was 99% consistent for 41528043 target  
377 pairs (24%). Requiring at least a 2-fold difference in median success probability between  $T_B$  and  
378  $T_A$  reduced these counts to 2,730,437 target pairs (1.6%) at 95% consistency and 2,700,856  
379 target pairs (1.6%) at 99% consistency. We visualized these results by plotting the 95% and 99%  
380 consistency fraction thresholds smoothly interpolated as a function of the median predicted

381 probabilities of success of  $T_A$  and  $T_B$  (Fig 3E). For a median probability of success of  $T_A$  around  
382 0.2,  $T_B$  must have a median probability of success of 0.5 or greater at the 99% threshold. For  
383 lower  $T_A$  success probabilities, the  $T_B$  success probability must be even higher because there is  
384 greater uncertainty about the low  $T_A$  probabilities. For higher  $T_A$  success probabilities, the  $T_B$   
385 success probability at the 99% threshold increases steadily until a  $T_A$  success probability of about  
386 0.6, where the  $T_B$  success probability reaches 1. For  $T_A$  success probabilities above 0.6, no  
387 targets are predicted to have greater probability of success with 99% consistency.

388

### 389 *Feature interpretation*

390

391 To interpret the relationship inferred by the classifier between target features and outcomes, we  
392 created a heatmap of the probability of success predicted by the classifier projected onto the two  
393 features predominantly selected for the model: mean expression and standard deviation of  
394 expression across tissues (Fig 3F). The probability of success was high in the subspace with low  
395 mean expression and high standard deviation of expression, and transitioned to low probability in  
396 the subspace with high mean expression and low standard deviation of expression. This trend  
397 appeared to be consistent with the distribution of the success and failure examples in the space.

398

## 399 **DISCUSSION**

400

### 401 **Gene expression predicts phase III outcome**

402

403 We searched over 150,000 target features from 67 datasets covering 16 feature types for  
404 predictors of target success or failure in phase III clinical trials (Table 1, Fig 1). We found  
405 several features significantly correlated with phase III outcome, robust to re-sampling, and  
406 generalizable across target classes (Table 2). To assess the usefulness of such features, we  
407 implemented a nested cross-validation routine to select features, train a classifier to predict the  
408 probability a target will succeed in phase III clinical trials, and estimate the stability and  
409 generalization performance of the model (Figs 2 and 3, Tables 3, 4, and 5). Ultimately, we found  
410 two features useful for predicting success or failure of targets in phase III clinical trials.  
411 Successful targets tended to have low mean mRNA expression across tissues and high standard  
412 deviation of mRNA expression across tissues (Fig 3F). These features were significant in  
413 multiple gene expression datasets, which increased our confidence that their relationship to phase  
414 III outcome was real, at least for the targets in our sample, which included only targets of  
415 selective drugs indicated for non-cancer diseases.

416

417 One interpretation of why the gene expression features were predictive of phase III outcome is  
418 that they are informative of the specificity of a target's expression across tissues. A target with  
419 tissue specific expression would have a high standard deviation relative to its mean expression  
420 level. Tissue specific expression has been proposed by us and others as a favorable target  
421 characteristic in the past (4, 14, 60-62), but the hypothesis had not been evaluated empirically

422 using examples of targets that have succeeded or failed in clinical trials. For a given disease, if a  
423 target is expressed primarily in the disease tissue, it is considered more likely that a drug will be  
424 able to exert a therapeutic effect on the disease tissue while avoiding adverse effects on other  
425 tissues. Additionally, specific expression of a target in the tissue affected by a disease could be  
426 an indicator that dysfunction of the target truly causes the disease.

427

428 The distribution of the success and failure examples in feature space (Fig 3F) partially supports  
429 the hypothesis that tissue specific expression is a favorable target feature. Successes were  
430 enriched among targets with low mean expression and high standard deviation of expression  
431 (tissue specific expression), and failures were enriched among targets with high mean expression  
432 and low standard deviation of expression (constitutive expression). However, it does not hold in  
433 general that, at any given mean expression level, targets with high standard deviation of  
434 expression tend to be more successful than targets with low standard deviation of expression.  
435 Nevertheless, our results encourage further investigation of the relationship between tissue  
436 specific expression and clinical trial outcomes. Deeper insight may be gleaned from analysis of  
437 gene expression features explicitly designed to quantify specificity of a target's expression in the  
438 tissue(s) affected by the disease treated in each clinical trial.

439

#### 440 **Caveats and limitations**

441

442 Latent factors (variables unaccounted for in this analysis) could confound relationships between  
443 target features and phase III outcomes. For example, diseases pursued vary from target to target,  
444 and a target's expression across tissues may be irrelevant for diseases where drugs can be



445 delivered locally or for Mendelian loss-of-function diseases where treatment requires systemic  
446 replacement of a missing or defective protein. Also, clinical trial failure rates vary across disease  
447 classes (2). Although we excluded targets of cancer therapeutics from our analysis, we otherwise  
448 did not control for disease class as a confounding explanatory factor. Modalities (e.g. small  
449 molecule, antibody, antisense oligonucleotide, gene therapy, or protein replacement) and  
450 directions (e.g. activation or inhibition) of target modulation also vary from target to target and  
451 could be confounding explanatory factors or alter the dependency between target features and  
452 outcomes.

453  
454 The potential issues described above are symptoms of the fact that our analysis (and any analysis  
455 of clinical trial outcomes) attempts to draw conclusions from a small (roughly 300 targets) and  
456 biased sample (63, 64). Latent factors such as target classes, disease classes, modalities, and  
457 directions of target modulation are not uniformly represented in the sample, yet correlations  
458 between target features and clinical trial outcomes likely depend on these factors. Unfortunately,  
459 attempts to stratify, match, or otherwise control for these factors are limited by the sample size.  
460 (The number of combinations of target class, disease class, modality, and direction of modulation  
461 exceeds the sample size.) We employed several tests to build confidence that our findings  
462 generalize across target classes, but did not address other latent factors. Consequently, we cannot  
463 be sure that conclusions drawn from this study apply equally to targets modulated in any  
464 direction, by any means, to treat any disease. For specific cases, expert knowledge and common  
465 sense should be relied upon to determine whether conclusions from this study (or similar studies)  
466 are relevant.

467

468 Another limitation is selection bias (63, 64). Targets of drugs are not randomly selected from the  
469 genome and cannot be considered representative of the population of all possible targets.  
470 Likewise, diseases treated by drugs are not randomly chosen; therefore, phase III clinical trial  
471 outcomes for each target cannot be considered representative of the population of all possible  
472 outcomes. Although we implemented tests to build confidence that our findings can generalize to  
473 new targets and new target classes, ultimately, no matter how we dissect the sample, a degree of  
474 uncertainty will always remain about the relevance of any findings for new targets that lack a  
475 representative counterpart in the sample.

476  
477 Additionally, data processing and modeling decisions have introduced bias into the analysis. For  
478 example, we scored each target as successful or failed by its best outcome in all applicable  
479 (selective drug, non-cancer indication) phase III clinical trials. This approach ignores nuances. A  
480 target that succeeded in one trial and failed in all others is treated as equally successful as a target  
481 that succeeded in all trials. Also, the outcome of a target tested in a single trial is treated as  
482 equally certain as the outcome of a target tested in multiple trials. Representing target outcomes  
483 as success rates or probabilities may provide better signal for discovering features predictive of  
484 outcomes.

485  
486 Another decision was to use datasets of features as we found them, rather than trying to reason  
487 about useful features that could be derived from the original data. Because of the breadth of data  
488 we interrogated, the effort and expertise necessary to hand engineer features equally well across  
489 all datasets exceeded our resources. Others have had success hand engineering features for  
490 similar applications in the past, particularly with respect to computing topological properties of

491 targets in protein-protein interaction networks (18, 20, 21). This analysis could benefit from such  
492 efforts, potentially changing a dataset or feature type from yielding no target features correlated  
493 with phase III outcomes to yielding one or several useful features (22). On a related point,  
494 because we placed a priority on discovering interpretable features, we performed dimensionality  
495 reduction by averaging groups of highly correlated features and concatenating their (usually  
496 semantically related) labels. Dimensionality reduction by principal components analysis (65) or  
497 by training a deep auto-encoder (66) could yield more useful features, albeit at the expense of  
498 interpretability.

499  
500 We cannot stress enough the importance of taking care not to draw broad conclusions from our  
501 study, particularly with respect to the apparent dearth of features predictive of target success or  
502 failure. We examined only a specific slice of clinical trial outcomes (phase III trials of selective  
503 drugs indicated for non-cancer diseases) summarized in a particular way (net outcome per target,  
504 as opposed to outcome per target-indication pair). Failure of a feature to be significant in our  
505 analysis should not be taken to mean it has no bearing on target selection. For example, prior  
506 studies have quantitatively shown that genetic evidence of disease association(s) is a favorable  
507 target characteristic (3, 36), but we did not find a significant correlation between genetic  
508 evidence and target success in phase III clinical trials. Our finding is consistent with the work of  
509 Nelson et al. (36), who investigated the correlation between genetic evidence and drug  
510 development outcomes at all phases and found a significant correlation overall and at all phases  
511 of development except phase III. As a way of checking our work, we applied our methods to test  
512 for features that differ between targets of approved drugs and the remainder of the druggable  
513 genome (instead of targets of phase III failures), and we recovered the finding of Nelson et al.

514 that targets of approved drugs have significantly more genetic evidence than the remainder of the  
515 druggable genome (Supplementary Table S6). This example serves as a reminder to be cognizant  
516 of the domain of applicability of research findings. Though we believe we have performed a  
517 rigorous and useful analysis, we have shed light on only a small piece of a large and complex  
518 puzzle.

519  
520 Advances in machine learning enable and embolden us to create potentially powerful predictive  
521 models for target selection. However, as described in the limitations, scarce training data are  
522 available, the data are far from ideal, and we must be cautious about building models with biased  
523 data and interpreting their predictions. For example, many features that appeared to be  
524 significantly correlated with phase III clinical trial outcomes in our primary analysis did not hold  
525 up when we accounted for target class selection bias. This study highlights the need for both  
526 domain knowledge and modeling expertise to tackle such challenging problems.

527

## 528 **Conclusion**

529

530 Our analysis revealed several features that significantly separated targets of approved drugs from  
531 targets of drug candidates that failed in phase III clinical trials. This suggested that it is feasible  
532 to construct a model integrating multiple interpretable target features derived from Omics  
533 datasets to inform target selection. Only features derived from tissue expression datasets were  
534 promising predictors of success versus failure in phase III, specifically, mean mRNA expression  
535 and standard deviation of expression across tissues. Although these features were significant at a  
536 false discovery rate cut-off of 0.05, their effect sizes were too small to be useful for classification

537 of the majority of untested targets, however, even a two-fold improvement in target quality can  
538 dramatically increase R&D productivity (67). We identified 943 targets predicted to be twice as  
539 likely to fail in phase III clinical trials as past phase III targets, and, therefore, should be flagged  
540 as having unfavorable expression characteristics. We also identified 2,700,856 target pairs  
541 predicted with 99% consistency to have a 2-fold difference in success probability, which could  
542 be useful for prioritizing short lists of targets with attractive disease relevance.

543  
544 It should be noted that our analysis was not designed or powered to show that specific datasets or  
545 data types have no bearing on target selection. There are many reasons why a dataset may not  
546 have yielded any significant features in our analysis. In particular, data processing and filtering  
547 choices could determine whether or not a dataset or data type has predictive value. Also, latent  
548 factors, such as target classes, disease classes, modalities, and directions of target modulation,  
549 could confound or alter the dependency between target features and clinical trial outcomes.  
550 Finally, although we implemented tests to ensure robustness and generalizability of the target  
551 features significantly correlated with phase III outcomes, selection bias in the sample of targets  
552 available for analysis is a non-negligible limitation of this study and others of its kind.  
553 Nevertheless, we are encouraged by our results and anticipate deeper insights and better models  
554 in the future, as researchers improve methods for handling sample biases and learn more  
555 informative features.

556

557 **METHODS**

558

559 **Data**

560

561 *Clinical Outcomes*

562

563 We extracted data from Citeline’s Pharmaprojects database (38) (downloaded May 27, 2016),  
564 reformatting available XML data into a single tab-delimited form having one row for each asset  
565 (i.e. drug or drug candidate)/company combination. For each asset, known targets, identified  
566 with EntrezGene (68) IDs and symbols, and indications are reported. We obtained 107,120 asset-  
567 indication pairs and 37,211 asset-target pairs, correcting a single outdated EntrezGene ID, for  
568 SCN2A, which we updated from 6325 to 6326.

569

570 An overall pipeline status of each asset (e.g. “Launched”, “Discontinued”, “No Development  
571 Reported”) is reported in a single field (“Status”), and detailed information for each indication  
572 being pursued is dispersed throughout several other fields (e.g., “Key Event Detail”,  
573 “Overview”, etc.). While many assets have been tried against a single indication, and thus the  
574 status of the asset-indication pair is certain, the majority (N=61,107) of asset-indication pairs are  
575 for assets with multiple indications. For those pairs, we used a combination of string searching of  
576 these fields and manual review of the results to determine the likely pipeline location and status  
577 of each indication. For example, we excluded efforts where a trial of an asset was reported as  
578 planned, but no further information was available. Asset-indication pairs were thus assigned a  
579 status of Successful (“Launched”, “Registered”, or “Pre-registration”), Failed (“Discontinued”,

580 “No Development Reported”, “Withdrawn”, or “Suspended”), or In Progress, consisting of  
581 9,337, 72,269 and 25,159 pairs, respectively. We then used the pipeline location to assign each  
582 asset-indication pair to one of 10 outcomes: Succeeded, In Progress-Preclinical, In Progress-  
583 Phase I, In Progress-Phase II, In Progress-Phase III, Failed-Preclinical, Failed-Phase I, Failed-  
584 Phase II, Failed-Phase III, and Failed-Withdrawn. We discarded indications which were  
585 diagnostic in nature or unspecified, mapping the remainder to Medical Subject Headings (MeSH)  
586 (69). We also observed that only 24% of the failures reported in Pharmaprojects are clinical  
587 failures, suggesting a clinical success rate of nearly 35%, much higher than typically cited (67).

588  
589 We joined the list of asset-indication-outcome triples with the list of asset-target pairs to produce  
590 a list of asset-target-indication-outcome quadruples. We then filtered the list to remove: 1) assets  
591 with more than one target, 2) non-human targets, 3) cancer indications (indications mapped to  
592 MeSH tree C04), and 4) outcomes labeled as In Progress at any stage or Failed prior to Phase III.  
593 We scored the remaining targets (N=331) as Succeeded (N=259), if the target had at least one  
594 successful asset remaining in the list, or Failed (N=72), otherwise.

595

### 596 *Target Features*

597

598 We obtained target features from the Harmonizome (39), a recently published collection of  
599 features of genes and proteins extracted from over 100 Omics datasets. We downloaded (on June  
600 30, 2016) a subset of Harmonizome datasets that were in the public domain or GSK had  
601 independently licensed (Table 1). Each dataset was structured as a matrix with genes labeling the  
602 rows and features such as diseases, phenotypes, tissues, and pathways labeling the columns.

603 Genes were identified with EntrezGene IDs and symbols, enabling facile integration with the  
604 clinical outcome data from Pharmaprojects. Some datasets were available on the Harmonizome  
605 as a “cleaned” version and a “standardized” version. In all instances, we used the cleaned  
606 version, which preserved the original data values (e.g. gene expression values), as opposed to the  
607 standardized version, in which the original data values were transformed into scores indicating  
608 relative strengths of gene-feature associations intended to be comparable across datasets. The  
609 data matrices were quantitative and filled-in (e.g. gene expression measured by microarray),  
610 quantitative and sparse (e.g. protein expression measured by immunohistochemistry), or  
611 categorical (i.e. binary) and sparse (e.g. pathway associations curated by experts). We  
612 standardized quantitative, filled-in features by subtracting the mean and then dividing by the  
613 standard deviation. We scaled quantitative, sparse features by dividing by the mean. We included  
614 the mean and standard deviation calculated along the rows of each dataset as additional target  
615 features. We excluded features that had fewer than three non-zero values for the targets with  
616 phase III clinical trial outcomes. The remaining features, upon which our study was based, have  
617 been deposited at <https://github.com/arouillard/omic-features-successful-targets>.

618

## 619 **Dimensionality Reduction**

620

621 Our goals in performing dimensionality reduction were to identify groups of highly correlated  
622 features, avoid excessive multiple hypothesis testing, and maintain interpretability of features.  
623 For each dataset, we computed pair-wise feature correlations ( $r$ ) using the Spearman correlation  
624 coefficient (70-72) for quantitative, filled-in datasets, and the cosine coefficient (71, 72) for  
625 sparse or categorical datasets. We thresholded the correlation matrix at  $r^2=0.5$  (for the Spearman



626 correlation coefficient, this corresponds to one feature explaining 50% of the variance of another  
627 feature, and for the cosine coefficient, this corresponds to one feature being aligned within 45  
628 degrees of another feature) and ordered the features by decreasing number of correlated features.  
629 We created a group for the first feature and its correlated features. If the dataset mean was  
630 included in the group, we replaced the group of features with the dataset mean. Otherwise, we  
631 replaced the group of features with the group mean and assigned it the label of the first feature  
632 (to indicate that the feature represents the average of features correlated with the first feature),  
633 while also retaining a list of the labels of all features included in the group. We continued  
634 through the list of features, repeating the grouping process as described for the first feature,  
635 except excluding features already assigned to a group from being assigned to a second group.

636

### 637 **Feature Selection**

638

639 We performed permutation tests (40, 41) to find features with a significant difference between  
640 successful and failed targets. We used permutation testing in order to apply the same significance  
641 testing method to all features. The features in our collection had heterogeneous shapes of their  
642 distributions and varying degrees of sparsity, and therefore no single parametric test would be  
643 appropriate for all features. Furthermore, individual features frequently violated assumptions  
644 required for parametric tests, such as normality for the t-test (for continuous-valued features) or  
645 having at least five observations in each entry of the contingency table for the Chi-squared test  
646 (for categorical features). For each feature, we performed  $10^5$  success/failure label permutations  
647 to obtain a null distribution for the difference between the means of successful and failed targets,  
648 and then calculated an empirical two-tailed p-value as the fraction of permutations that yielded a

649 difference between means at least as extreme as the actual observed difference. We used the  
650 Benjamini-Yekutieli method (42) to correct for multiple hypothesis testing within each dataset  
651 and accepted features with corrected p-values less than 0.05 as significantly correlated with  
652 phase III clinical trial outcomes, thus controlling the false discovery rate at 0.05 within each  
653 dataset.

654

## 655 **Feature Robustness and Generalizability**

656

### 657 *Robustness to sample variation*

658

659 We used bootstrapping (53, 54) to investigate how robust our significance findings were to  
660 variation in the success and failure examples. We created a bootstrap sample by sampling with  
661 replacement from the original set of examples to construct an equal sized set of examples. For  
662 each dataset that yielded significant features in our primary analysis, we repeated the analysis on  
663 the bootstrap sample and recorded whether the features were still significant at the  
664 aforementioned 0.05 false discovery rate cut-off. We performed this procedure on 1000 bootstrap  
665 samples and quantified the replication probability (55) of each feature as the fraction of  
666 bootstraps showing a significant correlation between the feature and phase III clinical trial  
667 outcomes. We accepted features with replication probabilities greater than 0.8 (55) as robust to  
668 sample variation.

669

### 670 *Robustness to target class variation*

671

672 We tested if any of the significance findings depended upon the presence of targets from a single  
673 target class in our sample. We obtained target class labels (i.e. gene family labels) from the  
674 HUGO Gene Nomenclature Committee (56) (downloaded April 19, 2016) and created binary  
675 features indicating target class membership. Using the same permutation testing and multiple  
676 hypothesis testing correction methods described above for feature selection, we tested if any  
677 target classes were significantly correlated with phase III clinical trial outcomes. Then, we tested  
678 if the significant target classes were correlated with any significant features. Such features might  
679 be correlated with clinical outcome only because they are surrogate indicators for particular  
680 target classes that have been historically very successful or unsuccessful, as opposed to the  
681 features being predictors of clinical outcome irrespective of target class. To test this possibility,  
682 we performed a bootstrapping procedure as described above, except did not allow examples from  
683 target classes correlated with clinical outcome to be drawn when re-sampling. Thus, the modified  
684 bootstrapping procedure provided replication probabilities conditioned upon missing information  
685 about target classes correlated with clinical outcome. We accepted features with replication  
686 probabilities greater than 0.8 as robust to target class variation.

687

#### 688 *Generalization across target classes*

689

690 We implemented a modified permutation test, inspired by the approach of Epstein et al. (57) to  
691 correct for confounders in permutation testing, to select features correlated with phase III clinical  
692 trial outcomes while controlling for target class as a confounding explanatory factor. In the  
693 modified permutation test, success/failure labels were shuffled only within target classes, so the  
694 sets of null examples had the same ratios of successes to failures within target classes as in the

695 set of observed examples. Consequently, features had to correlate with clinical outcome within  
696 multiple classes to be significant, while features that discriminated between classes would not be  
697 significant. We performed bootstrapping as described previously to obtain replication  
698 probabilities for the significant features, in this case conditioned upon including target class as an  
699 explanatory factor. We accepted features with replication probabilities greater than 0.8 as  
700 generalizable across target classes represented in the sample.

701

## 702 **Clinical Outcome Classifier**

703

704 We trained a classifier to predict target success or failure in phase III clinical trials, using a  
705 procedure like the above for initial feature selection, then using cross-validation to select a model  
706 type (Random Forest or logistic regression) and subset of features useful for prediction. We used  
707 an outer cross-validation loop with 5-folds repeated 200 times, yielding a total of 1000 train-test  
708 cycles, to estimate the generalization performance and stability of the feature selection and  
709 model selection procedure (58). Each train-test cycle had five steps: 1) splitting examples into  
710 training and testing sets, 2) univariate feature selection on the training data, 3) aggregation of  
711 significant features from different datasets into a single feature matrix, 4) model selection and  
712 model-based (multivariate) feature selection on the training data, and 5) evaluation of the  
713 classifier on the test data.

714

715 *Step 2: Univariate feature selection*

716

717 Beginning with the non-redundant features obtained from dimensionality reduction, we  
718 performed modified permutation tests to find features with a significant difference between  
719 successful and failed targets in the training examples. As described above, for the modified  
720 permutation test, success/failure labels were shuffled only within target classes. This was done to  
721 control for target class as a confounding factor that might explain correlations between phase III  
722 outcomes and features. For each feature, we performed  $10^4$  success/failure label permutations  
723 and calculated an empirical two-tailed p-value. We corrected for multiple hypothesis testing  
724 within each dataset and accepted features with corrected p-values less than 0.05.

725

### 726 *Step 3. Feature aggregation*

727

728 Significant features from different datasets, each having different target coverage, had to be  
729 aggregated into a single feature matrix prior to training a classifier. When features from many  
730 datasets were aggregated, we found that the set of targets with no missing data across all features  
731 could become very small. To mitigate this, we excluded features from non-human datasets and  
732 small datasets (fewer than 2,000 genes). We also excluded features from the Allen Brain Atlas  
733 human brain expression atlas, unless there were no other significant features, because we noticed  
734 it had poor coverage of targets with phase III outcomes (287) compared to other expression  
735 atlases, such as BioGPS (320), GTEx (328), and HPA (314), which almost always yielded  
736 alternative significant expression-based features. After aggregating features into a single matrix,  
737 we min-max scaled the features so that features from different datasets would have the same  
738 range of values (from 0 to 1).

739

740 To reduce redundancy in the aggregated feature matrix, we grouped features as described for the  
741 primary analysis. We used the cosine coefficient to compute pair-wise feature correlations  
742 because some features were sparse. Instead of replacing groups of correlated features with the  
743 group mean, we selected the feature in each group that was best correlated with phase III  
744 outcomes, because we preferred not to create features derived from multiple datasets.

745

#### 746 *Step 4. Model selection and model-based feature selection*

747

748 We hypothesized that a Random Forest classifier (73) would be a reasonable model choice  
749 because the Random Forest model does not make any assumptions about the distributions of the  
750 features and can seamlessly handle a mixture of quantitative, categorical, filled-in, or sparse  
751 features. Furthermore, we expected each train-test cycle to yield only a handful of significant  
752 features. Consequently, we would have 10- to 100-fold more training examples than features and  
753 could potentially afford to explore non-linear feature combinations. We also trained logistic  
754 regression classifiers and used an inner cross-validation loop (described below) to choose  
755 between Random Forest and logistic regression for each train-test cycle of the outer cross-  
756 validation loop. We used the implementations of the Random Forest and logistic regression  
757 classifiers available in the Scikit-learn machine learning package for Python. To correct for  
758 unequal class sizes during training, the loss functions of these models weighted the training  
759 examples inversely proportional to the size of each example's class.

760

761 We performed incremental feature elimination with an inner cross-validation loop to 1) choose  
762 the type of classifier (Random Forest or logistic regression) and 2) choose the smallest subset of

763 features needed to maximize the performance of the classifier. First, we trained Random Forest  
764 and logistic regression models using the significant features aggregated in Step 2, performing 5-  
765 fold cross-validation repeated 20 times to obtain averages for the area under the receiver  
766 operating characteristic curve (AUROC) and area under the precision recall curve (AUPR). We  
767 also obtained average feature importance scores from the Random Forest model. Next, we  
768 eliminated the feature with lowest importance score and trained the models using the reduced  
769 feature set, performing another round of 5-fold cross-validation repeated 20 times to obtain  
770 AUROC, AUPR, and feature importance scores. We continued eliminating features then  
771 obtaining cross-validation performance statistics and feature importance scores until no features  
772 remained. Then, we found all models with performance within 95% of the maximum AUROC  
773 and AUPR. If any logistic regression models satisfied this criterion, we selected the qualifying  
774 logistic regression model with fewest features. Otherwise, we selected the qualifying Random  
775 Forest model with fewest features.

776

#### 777 *Step 5. Classifier evaluation*

778

779 For each train-test cycle, after selecting a set of features and type of model (Random Forest or  
780 logistic regression) in Step 4, we re-fit the selected model to the training data and predicted  
781 success probabilities for targets in the test set as well as unlabeled targets. For each round of 5-  
782 fold cross-validation, we computed the classifier's receiver operating characteristic curve,  
783 precision-recall curve, and performance summary statistics, including the true positive rate, false  
784 positive rate, positive predictive value, negative predictive value, and Matthews correlation  
785 coefficient.

786

787 We computed distributions of the log odds ratios predicted by the classifier (log of the ratio of  
788 the predicted probability of success over the probability of failure) for the successful, failed, and  
789 untested (unlabeled) targets, aggregating predicted probabilities from the 200 repetitions of 5-  
790 fold cross-validation. Histograms of the log odds ratios for the three groups of targets were  
791 roughly bell-shaped, so we fit the distributions using kernel density estimation (59) with a  
792 Gaussian kernel and applied Silverman's rule for the bandwidth. We transformed the fitted  
793 distributions from a function of log odds ratio to a function of probability of success using the  
794 rule  $\text{pdf}(x) = \text{pdf}(y) \cdot |dy/dx|$ .

795

796 We created a heatmap of the probability of success predicted by the classifier projected onto the  
797 two dominant features in the model: mean mRNA expression across human tissues and standard  
798 deviation of mRNA expression across human tissues. We examined the heatmap to interpret the  
799 classifier's decision function and assess its plausibility.

800

801 To more concretely assess the usefulness of the classifier, we found the probability cut-off  
802 corresponding to the maximum median positive predictive value and determined the number of  
803 unlabeled targets predicted to succeed at that cut-off. Likewise, we found the probability cut-off  
804 corresponding to the maximum median negative predictive value and determined the number of  
805 unlabeled targets predicted to fail at that cut-off. We also created a heatmap illustrating the  
806 separation needed between the median predicted success probabilities of two targets in order to  
807 be confident that one target is more likely to succeed than the other. This heatmap was created by



808 calculating the fraction of times Target B had greater probability of success than Target A across  
809 the 200 repetitions of 5-fold cross-validation, for all pairs of targets.

810

## 811 **Implementation**

812

813 Computational analyses were written in Python 3.4.5 and have the following package  
814 dependencies: Fastcluster 1.1.20, Matplotlib 1.5.1, Numpy 1.11.3, Requests 2.13.0, Scikit-learn  
815 0.18.1, Scipy 0.18.1, and Statsmodels 0.6.1. Code, documentation, and data have been deposited  
816 on GitHub at <https://github.com/arouillard/omic-features-successful-targets>.

817

818

819 **ACKNOWLEDGMENTS**

820

821 Many thanks to Dr. Subhas Chakravorty for assisting with access to and processing of the  
822 Pharmaprojects data and to Dr. David Cooper for helpful direction regarding nested cross-  
823 validation.

824

825

826 **REFERENCES**

827

828 1. Arrowsmith J, Miller P. Trial watch: phase II and phase III attrition rates 2011-2012. Nat  
829 Rev Drug Discov. 2013;12(8):569.

830 2. Harrison RK. Phase II and phase III failures: 2013-2015. Nat Rev Drug Discov.  
831 2016;15(12):817-8.

832 3. Cook D, Brown D, Alexander R, March R, Morgan P, Satterthwaite G, et al. Lessons  
833 learned from the fate of AstraZeneca's drug pipeline: a five-dimensional framework. Nat Rev  
834 Drug Discov. 2014;13(6):419-31.

835 4. Gashaw I, Ellinghaus P, Sommer A, Asadullah K. What makes a good drug target? Drug  
836 Discov Today. 2011;16(23-24):1037-43.

837 5. Bunnage ME, Gilbert AM, Jones LH, Hett EC. Know your target, know your molecule.  
838 Nat Chem Biol. 2015;11(6):368-72.

839 6. Rouillard AD, Wang Z, Ma'ayan A. Abstraction for data integration: Fusing mammalian  
840 molecular, cellular and phenotype big datasets for better knowledge extraction. Comput Biol  
841 Chem. 2015;59 Pt B:123-38.

842 7. Rigden DJ, Fernandez-Suarez XM, Galperin MY. The 2016 database issue of Nucleic  
843 Acids Research and an updated molecular biology database collection. Nucleic Acids Res.  
844 2016;44(D1):D1-6.

845 8. Abi Hussein H, Geneix C, Petitjean M, Borrel A, Flatters D, Camproux AC. Global  
846 vision of druggability issues: applications and perspectives. Drug Discov Today.  
847 2017;22(2):404-15.

- 848 9. Fauman EB, Rai BK, Huang ES. Structure-based druggability assessment--identifying  
849 suitable targets for small molecule therapeutics. *Curr Opin Chem Biol.* 2011;15(4):463-8.
- 850 10. Perez-Lopez AR, Szalay KZ, Turei D, Modos D, Lenti K, Korcsmaros T, et al. Targets of  
851 drugs are generally, and targets of drugs having side effects are specifically good spreaders of  
852 human interactome perturbations. *Sci Rep.* 2015;5:10182.
- 853 11. Iwata H, Mizutani S, Tabei Y, Kotera M, Goto S, Yamanishi Y. Inferring protein  
854 domains associated with drug side effects based on drug-target interaction network. *BMC Syst  
855 Biol.* 2013;7(Suppl 6):S18.
- 856 12. Wang X, Thijssen B, Yu H. Target essentiality and centrality characterize drug side  
857 effects. *PLoS Comput Biol.* 2013;9(7):e1003119.
- 858 13. Kotlyar M, Fortney K, Jurisica I. Network-based characterization of drug-regulated  
859 genes, drug targets, and toxicity. *Methods.* 2012;57(4):499-507.
- 860 14. Kandoi G, Acencio ML, Lemke N. Prediction of Druggable Proteins Using Machine  
861 Learning and Systems Biology: A Mini-Review. *Front Physiol.* 2015;6:366.
- 862 15. Costa PR, Acencio ML, Lemke N. A machine learning approach for genome-wide  
863 prediction of morbid and druggable human genes based on systems-level data. *BMC Genomics.*  
864 2010;11(Suppl 5):S9.
- 865 16. Bakheet TM, Doig AJ. Properties and identification of human protein drug targets.  
866 *Bioinformatics.* 2009;25(4):451-7.
- 867 17. Li Q, Lai L. Prediction of potential drug targets based on simple sequence properties.  
868 *BMC Bioinformatics.* 2007;8:353.

- 869 18. Li ZC, Zhong WQ, Liu ZQ, Huang MH, Xie Y, Dai Z, et al. Large-scale identification of  
870 potential drug targets based on the topological features of human protein-protein interaction  
871 network. *Anal Chim Acta*. 2015;871:18-27.
- 872 19. Jeon J, Nim S, Teyra J, Datti A, Wrana JL, Sidhu SS, et al. A systematic approach to  
873 identify novel cancer drug targets using machine learning, inhibitor design and high-throughput  
874 screening. *Genome Med*. 2014;6(7):57.
- 875 20. Zhu M, Gao L, Li X, Liu Z, Xu C, Yan Y, et al. The analysis of the drug-targets based on  
876 the topological properties in the human protein-protein interaction network. *J Drug Target*.  
877 2009;17(7):524-32.
- 878 21. Yao L, Rzhetsky A. Quantitative systems-level determinants of human genes targeted by  
879 successful drugs. *Genome Res*. 2008;18(2):206-13.
- 880 22. Mora A, Donaldson IM. Effects of protein interaction data integration, representation and  
881 reliability on the use of network properties for drug target prediction. *BMC Bioinformatics*.  
882 2012;12(13):294.
- 883 23. Mitsopoulos C, Schierz AC, Workman P, Al-Lazikani B. Distinctive Behaviors of  
884 Druggable Proteins in Cellular Networks. *PLoS Comput Biol*. 2015;11(12):e1004597.
- 885 24. Xu H, Xu H, Lin M, Wang W, Li Z, Huang J, et al. Learning the drug target-likeness of a  
886 protein. *Proteomics*. 2007;7(23):4255-63.
- 887 25. Bull SC, Doig AJ. Properties of protein drug target classes. *PLoS One*.  
888 2015;10(3):e0117955.
- 889 26. Li S, Yu X, Zou C, Gong J, Liu X, Li H. Are Topological Properties of Drug Targets  
890 Based on Protein-Protein Interaction Network Ready to Predict Potential Drug Targets? *Comb*  
891 *Chem High Throughput Screen*. 2016;19(2):109-20.

- 892 27. Ghiassian SD, Menche J, Barabasi AL. A DIseAse MOdule Detection (DIAMOnD)  
893 algorithm derived from a systematic analysis of connectivity patterns of disease proteins in the  
894 human interactome. *PLoS Comput Biol*. 2015;11(4):e1004120.
- 895 28. Yang P, Li X, Chua HN, Kwoh CK, Ng SK. Ensemble positive unlabeled learning for  
896 disease gene identification. *PLoS One*. 2014;9(5):e97079.
- 897 29. Carson MB, Lu H. Network-based prediction and knowledge mining of disease genes.  
898 *BMC Med Genomics*. 2015;8(Suppl 2):S9.
- 899 30. Zhu C, Wu C, Aronow BJ, Jegga AG. Computational approaches for human disease gene  
900 prediction and ranking. *Adv Exp Med Biol*. 2014;799:69-84.
- 901 31. Piro RM, Di Cunto F. Computational approaches to disease-gene prediction: rationale,  
902 classification and successes. *FEBS J*. 2012;279(5):678-96.
- 903 32. Moreau Y, Tranchevent LC. Computational tools for prioritizing candidate genes:  
904 boosting disease gene discovery. *Nat Rev Genet*. 2012;13(8):523-36.
- 905 33. Emig D, Ivliev A, Pustovalova O, Lancashire L, Bureeva S, Nikolsky Y, et al. Drug  
906 target prediction and repositioning using an integrated network-based approach. *PLoS One*.  
907 2013;8(4):e60618.
- 908 34. Sun J, Zhu K, Zheng W, Xu H. A comparative study of disease genes and drug targets in  
909 the human protein interactome. *BMC Bioinformatics*. 2015;16(Suppl 5):S1.
- 910 35. Suthram S, Dudley JT, Chiang AP, Chen R, Hastie TJ, Butte AJ. Network-based  
911 elucidation of human disease similarities reveals common functional modules enriched for  
912 pluripotent drug targets. *PLoS Comput Biol*. 2010;6(2):e1000662.
- 913 36. Nelson MR, Tipney H, Painter JL, Shen J, Nicoletti P, Shen Y, et al. The support of  
914 human genetic evidence for approved drug indications. *Nat Genet*. 2015;47(8):856-60.

- 915 37. Heinemann F, Huber T, Meisel C, Bundschus M, Leser U. Reflection of successful  
916 anticancer drug development processes in the literature. *Drug Discov Today*. 2016;21(11):1740-  
917 4.
- 918 38. Pharmaprojects [Internet]. 2017. Available from:  
919 <https://pharmaintelligence.informa.com/products-and-services/data-and-analysis/pharmaprojects>.
- 920 39. Rouillard AD, Gundersen GW, Fernandez NF, Wang Z, Monteiro CD, McDermott MG,  
921 et al. The harmonizome: a collection of processed datasets gathered to serve and mine  
922 knowledge about genes and proteins. *Database (Oxford)*. 2016;2016.
- 923 40. Ernst MD. Permutation Methods: A Basis for Exact Inference. *Statistical Science*.  
924 2004;19(4):676-85.
- 925 41. Phipson B, Smyth GK. Permutation P-values should never be zero: calculating exact P-  
926 values when permutations are randomly drawn. *Stat Appl Genet Mol Biol*. 2010;9:Article39.
- 927 42. Benjamini Y, Yekutieli D. The control of the false discovery rate in multiple testing  
928 under dependency. *Annals of Statistics*. 2001;29(4):1165-88.
- 929 43. Sunkin SM, Ng L, Lau C, Dolbeare T, Gilbert TL, Thompson CL, et al. Allen Brain  
930 Atlas: an integrated spatio-temporal portal for exploring the central nervous system. *Nucleic  
931 acids research*. 2013;41(Database issue):D996-D1008.
- 932 44. Hawrylycz MJ, Lein ES, Guillozet-Bongaarts AL, Shen EH, Ng L, Miller JA, et al. An  
933 anatomically comprehensive atlas of the adult human brain transcriptome. *Nature*.  
934 2012;489(7416):391-9.
- 935 45. Lein ES, Hawrylycz MJ, Ao N, Ayres M, Bensinger A, Bernard A, et al. Genome-wide  
936 atlas of gene expression in the adult mouse brain. *Nature*. 2007;445(7124):168-76.

- 937 46. Wu C, MacLeod I, Su AI. BioGPS and MyGene. info: organizing online, gene-centric  
938 information. *Nucleic acids research*. 2012;gks1114.
- 939 47. Su AI, Cooke MP, Ching KA, Hakak Y, Walker JR, Wiltshire T, et al. Large-scale  
940 analysis of the human and mouse transcriptomes. *Proceedings of the National Academy of*  
941 *Sciences of the United States of America*. 2002;99(7):4465-70.
- 942 48. Su AI, Wiltshire T, Batalov S, Lapp H, Ching KA, Block D, et al. A gene atlas of the  
943 mouse and human protein-encoding transcriptomes. *Proceedings of the National Academy of*  
944 *Sciences of the United States of America*. 2004;101(16):6062-7.
- 945 49. Consortium G. The Genotype-Tissue Expression (GTEx) project. *Nature genetics*.  
946 2013;45(6):580-5.
- 947 50. Consortium G. Human genomics. The Genotype-Tissue Expression (GTEx) pilot  
948 analysis: multitissue gene regulation in humans. *Science*. 2015;348(6235):648-60.
- 949 51. Uhlen M, Fagerberg L, Hallstrom BM, Lindskog C, Oksvold P, Mardinoglu A, et al.  
950 Proteomics. Tissue-based map of the human proteome. *Science*. 2015;347(6220):1260419.
- 951 52. Santos A, Tsafou K, Stolte C, Pletscher-Frankild S, O'Donoghue SI, Jensen LJ.  
952 Comprehensive comparison of large-scale tissue expression datasets. *PeerJ*. 2015;3:e1054.
- 953 53. Efron B, Tibshirani R. *An introduction to the bootstrap*. New York: Chapman and Hall;  
954 1991.
- 955 54. Calmettes G, Drummond GB, Vowler SL. Making do with what we have: use your  
956 bootstraps. *J Physiol*. 2012;590(15):3403-6.
- 957 55. Jaffe AE, Storey JD, Ji H, Leek JT. Gene set bagging for estimating the probability a  
958 statistically significant result will replicate. *BMC Bioinformatics*. 2013;14:360.



- 959 56. Gray KA, Yates B, Seal RL, Wright MW, Bruford EA. Genenames.org: the HGNC  
960 resources in 2015. *Nucleic Acids Res.* 2015;43(Database issue):D1079-85.
- 961 57. Epstein MP, Duncan R, Jiang Y, Conneely KN, Allen AS, Satten GA. A permutation  
962 procedure to correct for confounders in case-control studies, including tests of rare variation. *Am*  
963 *J Hum Genet.* 2012;91(2):215-23.
- 964 58. Varma S, Simon R. Bias in error estimation when using cross-validation for model  
965 selection. *BMC Bioinformatics.* 2006;7:91.
- 966 59. Scott DW. *Multivariate Density Estimation: Theory, Practice, and Visualization*: John  
967 Wiley and Sons, Inc.; 1992.
- 968 60. Kumar V, Sanseau P, Simola DF, Hurler MR, Agarwal P. Systematic Analysis of Drug  
969 Targets Confirms Expression in Disease-Relevant Tissues. *Sci Rep.* 2016;6:36205.
- 970 61. Lage K, Hansen NT, Karlberg EO, Eklund AC, Roque FS, Donahoe PK, et al. A large-  
971 scale analysis of tissue-specific pathology and gene expression of human disease genes and  
972 complexes. *Proc Natl Acad Sci U S A.* 2008;105(52):20870-5.
- 973 62. Magger O, Waldman YY, Ruppin E, Sharan R. Enhancing the prioritization of disease-  
974 causing genes through tissue specific protein interaction networks. *PLoS Comput Biol.*  
975 2012;8(9):e1002690.
- 976 63. Grimes DA, Schulz KF. Bias and causal associations in observational research. *The*  
977 *Lancet.* 2002;359(9302):248-52.
- 978 64. Tripepi G, Jager KJ, Dekker FW, Zoccali C. Selection bias and information bias in  
979 clinical research. *Nephron Clin Pract.* 2010;115(2):c94-9.
- 980 65. Groth D, Hartmann S, Klie S, Selbig J. Principal components analysis. *Methods Mol*  
981 *Biol.* 2013;930:527-47.

- 982 66. Hinton GE, Salakhutdinov RR. Reducing the dimensionality of data with neural  
983 networks. *Science*. 2006;313(5786):504-7.
- 984 67. Hurle MR, Nelson MR, Agarwal P, Cardon LR. Trial watch: Impact of genetically  
985 supported target selection on R&D productivity. *Nature reviews Drug discovery*.  
986 2016;15(9):596-7.
- 987 68. Brown GR, Hem V, Katz KS, Ovetsky M, Wallin C, Ermolaeva O, et al. Gene: a gene-  
988 centered information resource at NCBI. *Nucleic Acids Res*. 2015;43(Database issue):D36-42.
- 989 69. Coletti MH, Bleich HL. Medical subject headings used to search the biomedical  
990 literature. *J Am Med Inform Assoc*. 2001;8(4):317-23.
- 991 70. Spearman C. The Proof and Measurement of Association between Two Things.  
992 *American Journal of Psychology*. 1904;15(1):72-101.
- 993 71. Frades I, Matthiesen R. Overview on techniques in cluster analysis. *Methods Mol Biol*.  
994 2010;593:81-107.
- 995 72. Deshpande R, Vandersluis B, Myers CL. Comparison of profile similarity measures for  
996 genetic interaction networks. *PLoS One*. 2013;8(7):e68664.
- 997 73. Breiman L. Random Forests. *Machine Learning*. 2001;45:5-32.  
998  
999

1000 **SUPPORTING INFORMATION**

1001

1002 **S1. Supplementary Table S1.** List of targets with their phase III outcome labels and predicted  
1003 success probabilities for 200 cross-validation repetitions.

1004

1005 **S2. Supplementary Table S2.** List of non-redundant features with their similar features and p-  
1006 values from the basic permutation test.

1007

1008 **S3. Supplementary Table S3.** List of classifier attributes (selected features, selected model type,  
1009 and test performance) for 1000 train-test cycles.

1010

1011 **S4. Supplementary Table S4.** Comparison of inner cross-validation loop AUROC and AUPR  
1012 values between Random Forest and logistic regression models for 1000 train-test cycles.

1013

1014 **S5. Supplementary Table S5.** List of classifier test performance statistics for 200 cross-  
1015 validation repetitions.

1016

1017 **S6. Supplementary Table S6.** Cases illustrating how the significance of genetic evidence (and  
1018 likely other types of evidence) as a predictor of target success depends on which targets are  
1019 compared.

1020

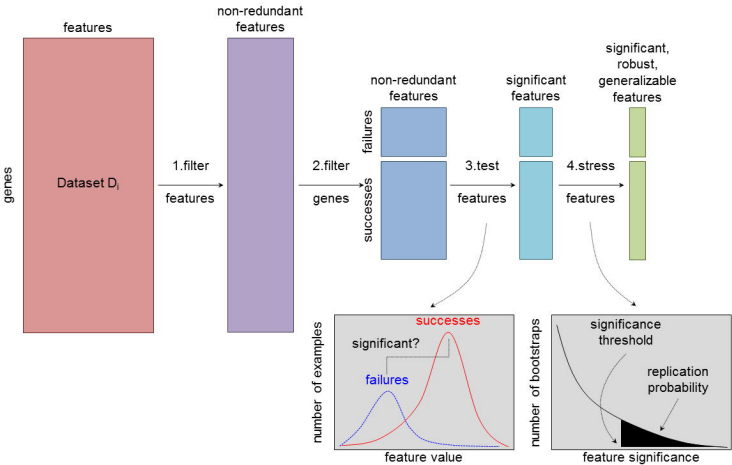

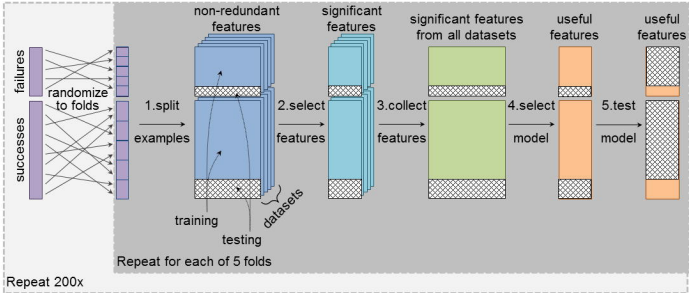

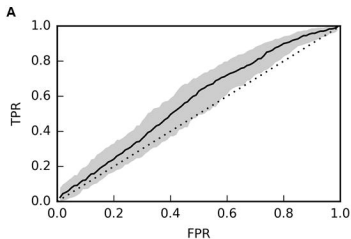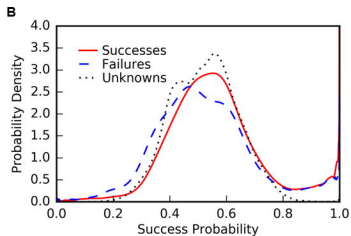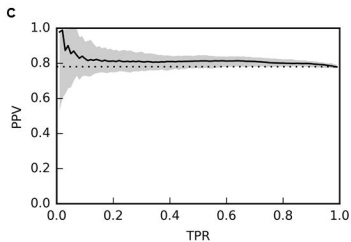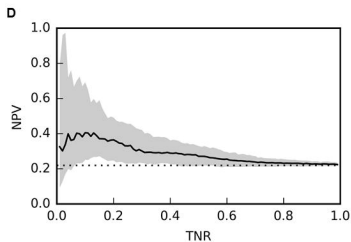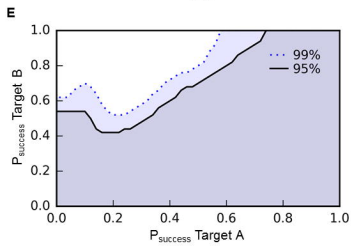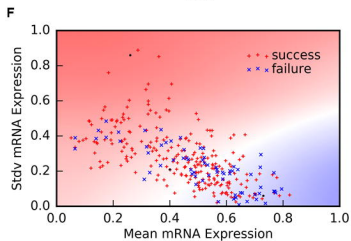

Source: https://www.biorxiv.org/content/10.1101/220848v1.full.pdf
